# Supplementary material for: Why the short face? Developmental disintegration of the neurocranium drives convergent evolution in neotropical electric fishes
Source: PubMed Central journal article supplement (PMC5355199; doi:10.1002/ece3.2704), 2017-02-15
Supplement: ECE3-7-1783-s001.pdf [file ECE3-7-1783-s001.pdf]

# Figure S1

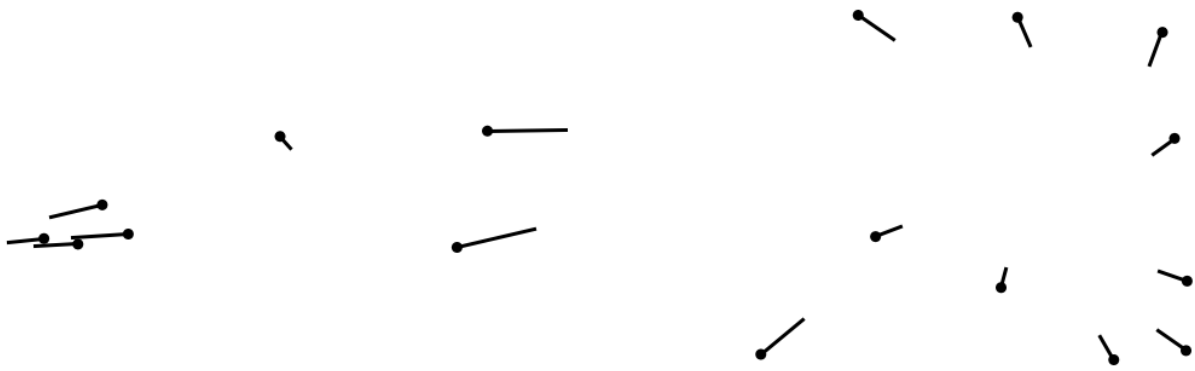

PC1
